# Supplementary material for: Validation of 16S rRNA and Complete rpoB Gene Sequence Analysis for the Identification of Elizabethkingia Species
Source: MDPI journal article supplement (doi:10.3390/ijms241613007), 2023-08-21
Supplement: s1 [file s1]

**Table S1. *Elizabethkingia* strains, isolation source, isolation country, iDDH value, and similarity of 16S rRNA gene and complete *rpoB* gene to each type strain.**

| Strain (GenBank accession no.)                 | Isolation source          | Isolation country | iDDH value | 16S rRNA similarity (%) | Complete <i>rpoB</i> similarity (%) |
|------------------------------------------------|---------------------------|-------------------|------------|-------------------------|-------------------------------------|
| <i>E. anophelis</i> 502 (AVCQ01000002.1)       | Wound swab                | United Kingdom    | 91.07      | 99.27                   | 99.29                               |
| <i>E. anophelis</i> CIP60.58 (FTQY01000009.1)  | NA                        | NA                | 93.42      | 99.27                   | 99.56                               |
| <i>E. anophelis</i> CIP111046 (FTRB01000010.1) | NA                        | NA                | 87.09      | 99.27                   | 99.14                               |
| <i>E. anophelis</i> CIP111067 (FTQZ01000016.1) | NA                        | NA                | 92.48      | 99.87                   | 99.61                               |
| <i>E. anophelis</i> E18064 (CCAB010000143.1)   | NA                        | NA                | 92.41      | 99.93                   | 98.25                               |
| <i>E. anophelis</i> DSM-23781 (FLST01000010.1) | NA                        | NA                | 98.21      | 100                     | 100                                 |
| <i>E. anophelis</i> PW2810 (CBYF010000021.1)   | NA                        | NA                | 88.85      | 99.27                   | 99.11                               |
| <i>E. anophelis</i> NUH1 (ASYH01000018.1)      | Hand hygiene sink aerator | Singapore         | 81.59      | 99.93                   | 99.48                               |
| <i>E. anophelis</i> NUH4 (ASYI01000018.1)      | Hand hygiene sink aerator | Singapore         | 79.48      | 99.93                   | 99.48                               |
| <i>E. anophelis</i> NUH6 (ASYJ01000035.1)      | Hand hygiene sink aerator | Singapore         | 86.54      | 99.93                   | 99.48                               |
| <i>E. anophelis</i> NUH11 (ASYK01000059.1)     | Hand hygiene sink aerator | Singapore         | 86.52      | 99.93                   | 99.48                               |
| <i>E. anophelis</i> NUHP2 (ASYF01000012.1)     | Hand hygiene sink aerator | Singapore         | 81.72      | 99.93                   | 99.48                               |
| <i>E. anophelis</i> NUHP3 (ASYG01000015.1)     | NA                        | Singapore         | 81.72      | 99.93                   | 99.48                               |
| <i>E. anophelis</i> PW2806 (CBYD010000040.1)   | NA                        | NA                | 93.33      | 99.93                   | 99.56                               |
| <i>E. anophelis</i> PW2809 (CBYE010000030.1)   | NA                        | NA                | 93.29      | 99.28                   | 99.56                               |
| <i>E. anophelis</i> 3375 (MAHM01000015.1)      | NA                        | USA               | 92.37      | 99.74                   | 99.53                               |
| <i>E. anophelis</i> 6499925 (QNTZ01000010.1)   | Blood                     | USA               | 93.32      | 99.74                   | 99.61                               |
| <i>E. anophelis</i> 40313151 (QNTY01000011.1)  | Blood                     | USA               | 92.61      | 99.74                   | 99.53                               |
| <i>E. anophelis</i> B2D (JNCG01000001.1)       | Dental plaque             | Malaysia          | 85.21      | 99.34                   | 99.11                               |

|                                                      |                 |         |       |       |       |
|------------------------------------------------------|-----------------|---------|-------|-------|-------|
| <i>E. anophelis</i> BP8467 (VTFI01000009.1)          | Blood           | Vellore | 93.34 | 99.8  | 99.61 |
| <i>E. anophelis</i> CSID 3000516074 (MAHA01000005.1) | NA              | USA     | 92.35 | 99.74 | 99.53 |
| <i>E. anophelis</i> CSID 3000516810 (MAHH01000024.1) | NA              | USA     | 93.4  | 99.93 | 99.5  |
| <i>E. anophelis</i> CSID 3000516978 (MAHJ01000016.1) | NA              | USA     | 87.26 | 99.34 | 99.24 |
| <i>E. anophelis</i> CSID 3000517066 (MAHL01000016.1) | NA              | USA     | 86.46 | 99.34 | 99.27 |
| <i>E. anophelis</i> CSID 3015183679 (MAHO01000015.1) | NA              | USA     | 89.76 | 99.93 | 99.45 |
| <i>E. anophelis</i> EM361-97 (LWDS01000010.1)        | Blood           | Taiwan  | 91.43 | 100   | 99.16 |
| <i>E. anophelis</i> Po0527107 (CCAC010000034.1)      | NA              | NA      | 92.42 | 99.93 | 98.25 |
| <i>E. anophelis</i> LDVH-AR107 (CIP108654.1)         | Internal organs | France  | 83.99 | 99.93 | 98.25 |
| <i>E. anophelis</i> SQ122 (JADRJG010000001.1)        | Blood           | China   | 93.87 | 99.93 | 99.53 |
| <i>E. anophelis</i> EA1 (JACLEZ010000013.1)          | NA              | China   | 85.64 | 99.93 | 99.03 |
| <i>E. anophelis</i> EA2 (JACLFD010000007.1)          | NA              | China   | 93.28 | 99.74 | 99.53 |
| <i>E. anophelis</i> EA3 (JACLFE010000013.1)          | NA              | China   | 85.64 | 99.93 | 99.03 |
| <i>E. anophelis</i> EA4 (JACLFF010000007.1)          | NA              | China   | 94.05 | 99.93 | 99.61 |
| <i>E. anophelis</i> EA5 (JACLFG010000007.1)          | NA              | China   | 94.05 | 99.93 | 99.61 |
| <i>E. anophelis</i> EA6 (JACLFH010000017.1)          | NA              | China   | 97.84 | 100   | 100   |
| <i>E. anophelis</i> EA7 (JACLFI010000009.1)          | NA              | China   | 94.38 | 99.93 | 99.61 |
| <i>E. anophelis</i> EA8 (JACLFJ010000009.1)          | NA              | China   | 94.38 | 99.93 | 99.61 |
| <i>E. anophelis</i> EA9 (JACLFK010000006.1)          | NA              | China   | 94.09 | 99.93 | 99.61 |
| <i>E. anophelis</i> EA10 (JACLEP010000007.1)         | NA              | China   | 94.06 | 99.93 | 99.61 |
| <i>E. anophelis</i> EA11 (JACLEQ010000009.1)         | NA              | China   | 94.38 | 99.93 | 99.61 |
| <i>E. anophelis</i> EA12 (JACLER010000009.1)         | NA              | China   | 94.38 | 99.93 | 99.61 |
| <i>E. anophelis</i> EA13 (JACLES010000006.1)         | NA              | China   | 94.05 | 99.93 | 99.61 |

|                                                      |                     |        |       |       |       |
|------------------------------------------------------|---------------------|--------|-------|-------|-------|
| <i>E. anophelis</i> EA14 (JACLET010000006.1)         | NA                  | China  | 94.05 | 99.93 | 99.61 |
| <i>E. anophelis</i> EA15 (JACLEU010000013.1)         | NA                  | China  | 85.64 | 99.93 | 99.03 |
| <i>E. anophelis</i> EA16 (JACLEV010000007.1)         | NA                  | China  | 94.09 | 99.93 | 99.61 |
| <i>E. anophelis</i> EA17 (JACLEW010000007.1)         | NA                  | China  | 94.05 | 99.93 | 100   |
| <i>E. anophelis</i> EA18 (JACLEX010000007.1)         | NA                  | China  | 93.28 | 99.74 | 99.53 |
| <i>E. anophelis</i> EA19 (JACLEY010000007.1)         | NA                  | China  | 93.28 | 99.74 | 99.53 |
| <i>E. anophelis</i> EA20 (JACLFA010000013.1)         | NA                  | China  | 85.64 | 99.93 | 99.03 |
| <i>E. anophelis</i> EA21 (JACLFB010000008.1)         | NA                  | China  | 93.28 | 99.74 | 99.53 |
| <i>E. anophelis</i> EA22 (JACLFC010000013.1)         | NA                  | China  | 85.63 | 99.93 | 99.03 |
| <i>E. anophelis</i> UCLA2018 (JADEZX010000029.1)     | Blood               | USA    | 81.68 | 99.93 | 99.48 |
| <i>E. anophelis</i> CSID 3000653323 (NWMM01000008.1) | Blood               | USA    | 86.41 | 99.34 | 100   |
| <i>E. anophelis</i> CSID 3000726633 (NWMIO1000004.1) | Blood               | USA    | 85.7  | 99.34 | 99.11 |
| <i>E. anophelis</i> CSID 3000726811 (NWMH01000002.1) | Urine               | USA    | 85.7  | 99.34 | 99.11 |
| <i>E. anophelis</i> CSID 3015183680 (MAHP01000007.1) | NA                  | USA    | 78.03 | 99.93 | 99.48 |
| <i>E. anophelis</i> CSID 3015183686 (MAHR01000042.1) | NA                  | USA    | 82.7  | 99.93 | 99.48 |
| <i>E. anophelis</i> CSID 3015183678 (MAFY01000020.1) | NA                  | USA    | 95.43 | 99.93 | 99.69 |
| <i>E. anophelis</i> UCLA EA-1 (JADEZW010000013.1)    | Tracheal aspirate   | USA    | 81.68 | 99.93 | 99.48 |
| <i>E. anophelis</i> As1 (LFKT01000010.1)             | Whole mosquito body | USA    | 98.18 | 100   | 100   |
| <i>E. anophelis</i> F3543 (MAHT01000006.1)           | CSF                 | USA    | 93.26 | 99.74 | 99.53 |
| <i>E. anophelis</i> PHOL-785 (RSAV01000007.1)        | Endoscopy specimen  | Canada | 87.14 | 99.24 | 99.16 |
| <i>E. anophelis</i> PHOL-104 (RSAW01000010.1)        | Fluid               | Canada | 94    | 99.93 | 99.5  |
| <i>E. anophelis</i> PHOL-537 (RSAX01000013.1)        | Urine               | Canada | 89.01 | 99.27 | 99.16 |
| <i>E. anophelis</i> PHOL-515 (RSAY01000011.1)        | Blood               | Canada | 94.53 | 99.74 | 99.5  |

|                                                  |                                    |        |       |       |       |
|--------------------------------------------------|------------------------------------|--------|-------|-------|-------|
| <i>E. anophelis</i> PHOL-090 (RSAZ01000007.1)    | Aspirate                           | Canada | 93.75 | 100   | 99.29 |
| <i>E. anophelis</i> GX130 (SYWB01000016.1)       | Blood                              | China  | 94.99 | 100   | 99.5  |
| <i>E. anophelis</i> NCTC10586 (UARL01000016.1)   | NA                                 | NA     | 92.86 | 99.74 | 99.53 |
| <i>E. anophelis</i> OSUVM1 (PJMA01000002.1)      | Equine stall                       | USA    | 88.76 | 99.34 | 99.11 |
| <i>E. anophelis</i> NCTC10588 (UFYD01000001.1)   | NA                                 | NA     | 94.47 | 99.93 | 99.58 |
| <i>E. anophelis</i> 3375 (CP016373.1)            | NA                                 | USA    | 93.29 | 99.74 | 99.53 |
| <i>E. anophelis</i> R26 (CP023401.1)             | <i>Anopheles gambiae</i> G3 adults | Sweden | 98.3  | 100   | 100   |
| <i>E. anophelis</i> F3543 (CP014340.1)           | Cerebrospinal fluid                | USA    | 93.36 | 99.74 | 99.53 |
| <i>E. anophelis</i> E6809 (CP014339.1)           | Blood                              | USA    | 92.59 | 99.74 | 99.53 |
| <i>E. anophelis</i> Ag1 (CP023402.1)             | Gut                                | USA    | 98.29 | 100   | 100   |
| <i>E. anophelis</i> 0422 (CP016370.1)            | Blood                              | USA    | 93.59 | 99.67 | 99.56 |
| <i>E. anophelis</i> F3201 (CP016374.1)           | NA                                 | Kuwait | 89.06 | 99.27 | 99.14 |
| <i>E. anophelis</i> FMS-007 (CP006576.1)         | Sputum                             | China  | 92.31 | 100   | 99.5  |
| <i>E. anophelis</i> CSID 3015183684 (CP015066.2) | Blood                              | USA    | 94.19 | 99.93 | 99.69 |
| <i>E. anophelis</i> CSID 3000521207 (CP015067.2) | NA                                 | USA    | 94.24 | 99.93 | 99.69 |
| <i>E. anophelis</i> CSID 3015183681 (CP015068.2) | NA                                 | USA    | 94.19 | 99.93 | 99.69 |
| <i>E. anophelis</i> SEA01 (CP069277.1)           | Blood                              | India  | 90.37 | 98.88 | 99.27 |
| <i>E. anophelis</i> 2008N07-201 (CP077751.1)     | Blood                              | Taiwan | 91.55 | 100   | 99.27 |
| <i>E. anophelis</i> 090-MNO-R (CP077749.1)       | Blood                              | Taiwan | 94.18 | 99.67 | 99.69 |
| <i>E. anophelis</i> 2002C02-176 (CP077754.1)     | Respiratory tract                  | Taiwan | 91.54 | 100   | 99.27 |
| <i>E. anophelis</i> 229-MNO-R (CP077750.1)       | Blood                              | Taiwan | 93.5  | 100   | 99.61 |
| <i>E. anophelis</i> 2002N07-090 (CP077753.1)     | Blood                              | Taiwan | 94.18 | 99.67 | 99.69 |
| <i>E. anophelis</i> 2008S01-229 (CP077752.1)     | Blood                              | Taiwan | 93.51 | 100   | 99.61 |

|                                                          |                       |           |       |       |       |
|----------------------------------------------------------|-----------------------|-----------|-------|-------|-------|
| <i>E. anophelis</i> CSID 3015183678 (CP014805.2)         | NA                    | USA       | 94.19 | 99.93 | 99.69 |
| <i>E. anophelis</i> NUHP1 (CP007547.1)                   | NA                    | Singapore | 93.1  | 99.93 | 99.48 |
| <i>E. anophelis</i> JUNP 353 (AP022313.1)                | NA                    | Nepal     | 93.51 | 99.93 | 99.48 |
| <i>E. anophelis</i> 296-96 (CP046080.1)                  | Blood                 | Taiwan    | 94.16 | 99.93 | 99.58 |
| <i>E. anophelis</i> AR6-8 (CP023403.1)                   | NA                    | China     | 98.29 | 100   | 100   |
| <i>E. anophelis</i> AR4-6 (CP023404.1)                   | NA                    | China     | 98.29 | 100   | 100   |
| <i>E. anophelis</i> SUE (CP034247.1)                     | Blood                 | Taiwan    | 94.16 | 99.93 | 99.58 |
| <i>E. anophelis</i> FDAARGOS 198 (CP023010.2)            | Blood                 | Sweden    | 93.28 | 99.74 | 99.53 |
| <i>E. anophelis</i> FDAARGOS 132 (CP014020.1)            | Endotracheal aspirate | USA       | 93.84 | 99.93 | 99.53 |
| <i>E. anophelis</i> FDAARGOS 134 (CP014021.1)            | Endotracheal aspirate | USA       | 93.84 | 99.93 | 99.53 |
| <i>E. anophelis</i> JM-87 (CP016372.1)                   | NA                    | USA       | 87.74 | 99.34 | 99.19 |
| <i>E. meningoseptica</i> CCUG 214 (FLSV01000007.1)       | NA                    | NA        | 98.24 | 100   | 100   |
| <i>E. meningoseptica</i> CIP111048 (FTPF01000007.1)      | NA                    | NA        | 95.35 | 99.74 | 99.82 |
| <i>E. meningoseptica</i> SQ101 (JADRJH010000001.1)       | NA                    | China     | 94.09 | 99.74 | 99.82 |
| <i>E. meningoseptica</i> 58-80 CIP80.33 (FTRA01000026.1) | Tracheal exudate      | NA        | 96.08 | 99.74 | 99.92 |
| <i>E. meningoseptica</i> NV2016 (FRFB01000010.1)         | NA                    | NA        | 97.51 | 99.87 | 99.87 |
| <i>E. meningoseptica</i> ATCC 13253 (ASAN01000025.1)     | NA                    | NA        | 98.18 | 100   | 100   |
| <i>E. meningoseptica</i> EM1 (MCJH01000009.1)            | Blood                 | NA        | 96.02 | 99.74 | 99.82 |
| <i>E. meningoseptica</i> EM2 (MDTZ01000014.1)            | Trachea               | USA       | 95.35 | 99.8  | 99.84 |
| <i>E. meningoseptica</i> EM3 (MDTY01000010.1)            | Trachea               | NA        | 96.02 | 99.74 | 99.82 |
| <i>E. meningoseptica</i> EM4 (JACLGJ010000016.1)         | NA                    | China     | 93.98 | 99.74 | 99.82 |
| <i>E. meningoseptica</i> EM5 (JACLGJ010000016.1)         | NA                    | China     | 94.07 | 99.74 | 99.82 |
| <i>E. meningoseptica</i> EM6 (JACLGK010000019.1)         | NA                    | China     | 94.07 | 99.74 | 99.82 |

|                                                           |    |       |       |       |       |
|-----------------------------------------------------------|----|-------|-------|-------|-------|
| <i>E. meningoseptica</i> EM7 (JACLGL010000016.1)          | NA | China | 94.07 | 99.74 | 99.82 |
| <i>E. meningoseptica</i> EM8 (JACLG010000016.1)           | NA | China | 94.07 | 99.74 | 99.82 |
| <i>E. meningoseptica</i> EM9 (JACLGN010000018.1)          | NA | China | 94.07 | 99.74 | 99.82 |
| <i>E. meningoseptica</i> EM10 (JACLFQ010000014.1)         | NA | China | 93.62 | 99.74 | 99.82 |
| <i>E. meningoseptica</i> EM11 (JACLFR010000017.1)         | NA | China | 94.07 | 99.74 | 99.82 |
| <i>E. meningoseptica</i> EM12 (JACLFS010000017.1)         | NA | China | 94.07 | 99.74 | 99.82 |
| <i>E. meningoseptica</i> EM13 (JACLFT010000017.1)         | NA | China | 94.07 | 99.74 | 99.82 |
| <i>E. meningoseptica</i> EM14 (JACLFU010000017.1)         | NA | China | 94.07 | 99.74 | 99.82 |
| <i>E. meningoseptica</i> EM15 (JACLFV010000017.1)         | NA | China | 94.07 | 99.74 | 99.82 |
| <i>E. meningoseptica</i> EM16 (JACLFW010000016.1)         | NA | China | 93.62 | 99.74 | 99.82 |
| <i>E. meningoseptica</i> EM17 (JACLFX010000016.1)         | NA | China | 93.62 | 99.74 | 99.82 |
| <i>E. meningoseptica</i> EM18 (JACLFY010000009.1)         | NA | China | 95.44 | 99.74 | 99.82 |
| <i>E. meningoseptica</i> EM19 (JACLFZ010000015.1)         | NA | China | 93.62 | 99.74 | 99.82 |
| <i>E. meningoseptica</i> EM20 (JACLGB010000016.1)         | NA | China | 93.98 | 99.74 | 99.82 |
| <i>E. meningoseptica</i> EM21 (JACLGC010000016.1)         | NA | China | 93.98 | 99.74 | 99.82 |
| <i>E. meningoseptica</i> EM22 (JACLGD010000017.1)         | NA | China | 93.62 | 99.74 | 99.82 |
| <i>E. meningoseptica</i> EM23 (JACLGE010000016.1)         | NA | China | 93.62 | 99.74 | 99.82 |
| <i>E. meningoseptica</i> EM24 (JACLGF010000015.1)         | NA | China | 93.98 | 99.74 | 99.82 |
| <i>E. meningoseptica</i> CSID 3000515919 (MAGZ01000024.1) | NA | USA   | 96.39 | 99.87 | 99.74 |
| <i>E. meningoseptica</i> CSID 3000516359 (MAHC01000017.1) | NA | USA   | 96.09 | 99.74 | 99.82 |
| <i>E. meningoseptica</i> CSID 3000516465 (MAHE01000019.1) | NA | USA   | 95.52 | 99.8  | 99.84 |
| <i>E. meningoseptica</i> CSID 3000516535 (MAHF01000018.1) | NA | USA   | 95.53 | 99.8  | 99.82 |
| <i>E. meningoseptica</i> CSID 3000516977 (MAHI01000014.1) | NA | USA   | 97.54 | 100   | 99.87 |

|                                                      |                         |                |       |       |       |
|------------------------------------------------------|-------------------------|----------------|-------|-------|-------|
| <i>E. meningoseptica</i> G4076 (MAHZ01000008.1)      | NA                      | United Kingdom | 98.24 | 99.87 | 100   |
| <i>E. meningoseptica</i> G4120 (MAIA01000008.1)      | NA                      | France         | 95.51 | 99.74 | 99.82 |
| <i>E. meningoseptica</i> 61421 PRCM (MPOG01000006.1) | NA                      | China          | 95.41 | 99.74 | 99.82 |
| <i>E. meningoseptica</i> GX196 (SYWC01000018.1)      | Blood                   | China          | 97.58 | 99.87 | 99.87 |
| <i>E. meningoseptica</i> NCTC10016 (LS483376.1)      | NA                      | NA             | 98.28 | 100   | 100   |
| <i>E. meningoseptica</i> KC1913 (CP014338.1)         | Cerebrospinal fluid     | USA            | 98.3  | 100   | 100   |
| <i>E. miricola</i> CIP111047 (FTQX01000011.1)        | NA                      | NA             | 77.27 | 100   | 99.58 |
| <i>E. miricola</i> LDVH-337.01 (CIP108653.1)         | Spleen                  | France         | 96.07 | 99.86 | 99.22 |
| <i>E. miricola</i> IMT47538 (JAAOKX010000023.1)      | NA                      | Germany        | 96.18 | 99.86 | 99.22 |
| <i>E. miricola</i> IMT47318 (JAAOKZ010000034.1)      | NA                      | Germany        | 95.94 | 99.86 | 99.22 |
| <i>E. miricola</i> KCTC 12492 (FLSS01000007.1)       | NA                      | NA             | 98.3  | 100   | 100   |
| <i>E. miricola</i> EM CHUV (LIQC01000021.1)          | Endotracheal secretions | Switzerland    | 72.42 | 99.93 | 99.16 |
| <i>E. miricola</i> G4071 (LNOI01000009.1)            | Tracheal exudate        | France         | 77.12 | 100   | 99.58 |
| <i>E. miricola</i> GTC 862 (LSGQ01000005.1)          | NA                      | NA             | 98.3  | 100   | 100   |
| <i>E. miricola</i> CSID 3000517120 (MAGX01000007.1)  | NA                      | USA            | 92.58 | 99.44 | 99.22 |
| <i>E. miricola</i> CSID 3000516464 (MAHD01000012.1)  | NA                      | USA            | 78.4  | 99.51 | 99.29 |
| <i>E. miricola</i> CSID 3000516998 (MAHK01000017.1)  | NA                      | USA            | 75.21 | 99.44 | 99.61 |
| <i>E. miricola</i> NCTC11305 (UARN01000011.1)        | NA                      | NA             | 76.88 | 100   | 99.58 |
| <i>E. miricola</i> G4074 (MAHY01000011.1)            | NA                      | United Kingdom | 77.18 | 100   | 99.58 |
| <i>E. miricola</i> Mir-N11 (CP090369.1)              | NA                      | China          | 93.04 | 99.86 | 99.22 |
| <i>E. miricola</i> FL160902 (CP040516.1)             | Farming pond            | China          | 93.05 | 99.86 | 99.22 |
| <i>E. miricola</i> G4121 (MAIB01000003.1)            | NA                      | Sweden         | 78.21 | 100   | 99.58 |
| <i>E. bruuniana</i> EM798-26 (CP023746.1)            | Blood                   | Taiwan         | 91.82 | 99.86 | 98.98 |

|                                                      |                                                   |                |       |       |       |
|------------------------------------------------------|---------------------------------------------------|----------------|-------|-------|-------|
| <i>E. bruuniana</i> BM10 (CP011059.1)                | Hindgut                                           | South Korea    | 81.79 | 99.51 | 99.03 |
| <i>E. bruuniana</i> 6012926 (QNTX01000006.1)         | Blood                                             | USA            | 90.23 | 99.86 | 99.06 |
| <i>E. bruuniana</i> CSID 3000516589 (MAHG01000002.1) | NA                                                | USA            | 91.51 | 99.6  | 99.48 |
| <i>E. bruuniana</i> CSID 3015183685 (MAHQ01000008.1) | NA                                                | USA            | 91.67 | 99.87 | 99.27 |
| <i>E. bruuniana</i> FDAARGOS 1031 (CP067018.1)       | NA                                                | USA            | 97.7  | 100   | 100   |
| <i>E. bruuniana</i> G0153 (MAHW01000018.1)           | NA                                                | Ireland        | 91.22 | 99.6  | 99.24 |
| <i>E. bruuniana</i> G0146 (CP014337.1)               | NA                                                | United Kingdom | 98.3  | 100   | 100   |
| <i>E. bruuniana</i> ATCC 33958 (CP035811.1)          | Contaminated preparation of<br>carboxypeptidase A | USA            | 97.57 | 100   | 99.97 |
| <i>E. bruuniana</i> G4075 (LNOJ01000023.1)           | Blood                                             | France         | 98.18 | 100   | 100   |
| <i>E. ursingii</i> G4122 (LNOK01000023.1)            | Soil                                              | Denmark        | 98.3  | 100   | 100   |
| <i>E. ursingii</i> G4123 (CP016377.1)                | NA                                                | Denmark        | 89.78 | 99.93 | 99.32 |
| <i>E. ursingii</i> C1558 (MBDS01000012.1)            | NA                                                | NA             | 86.96 | 99.86 | 99.4  |
| <i>E. ursingii</i> CSID 3000516135 (MAHB01000010.1)  | NA                                                | USA            | 88.34 | 100   | 99.53 |
| <i>E. occulta</i> G4070 (MAHX01000006.1)             | NA                                                | Australia      | 98.3  | 100   | 100   |
| <i>E. occulta</i> F8124 (MBDR01000015.1)             | NA                                                | NA             | 97.45 | 99.6  | 100   |
| <i>E. argenteiflava</i> YB22 (JAAABJ010000676.1)     | Pods                                              | South Korea    | 98.3  | 100   | 100   |

---

16S rRNA, 16S ribosomal RNA.

*rpoB*, RNA polymerase  $\beta$ -subunit.

iDDH, in silico DNA-DNA hybridization.

NA, not available



**Table S2. *Elizabethkingia* strains, isolation source, isolation country, and similarity of 16S rRNA gene to *E. anophelis* subsp. *endophytica* type strain JM-87 .**

| <b>Strain (GenBank accession no.)</b>                            | <b>Isolation source</b> | <b>Isolation country</b> | <b>16S rRNA similarity (%)</b> |
|------------------------------------------------------------------|-------------------------|--------------------------|--------------------------------|
| <i>E. anophelis</i> subsp. <i>endophytica</i> JM-87 (CP016372.1) | NA                      | USA                      | 100                            |
| <i>E. anophelis</i> 502 (AVCQ01000002.1)                         | Wound swab              | United Kingdom           | 99.93                          |
| <i>E. anophelis</i> B2D (JNCG01000001.1)                         | Dental plaque           | Malaysia                 | 100                            |
| <i>E. anophelis</i> CIP111046 (FTRB01000010.1)                   | NA                      | NA                       | 99.93                          |
| <i>E. anophelis</i> CIP60.58 (FTQY01000009.1)                    | NA                      | NA                       | 99.34                          |
| <i>E. anophelis</i> CSID 3000516978 (MAHJ01000016.1)             | NA                      | USA                      | 100                            |
| <i>E. anophelis</i> CSID 3000517066 (MAHL01000016.1)             | NA                      | USA                      | 100                            |
| <i>E. anophelis</i> CSID 3000653323 (NWMM01000008.1)             | Blood                   | USA                      | 100                            |
| <i>E. anophelis</i> CSID 3000726633 (NWMH01000004.1)             | Blood                   | USA                      | 100                            |
| <i>E. anophelis</i> CSID 3000726811 (NWMH01000002.1)             | Urine                   | USA                      | 100                            |
| <i>E. anophelis</i> F3201 (CP016374.1)                           | NA                      | Kuwait                   | 99.93                          |
| <i>E. anophelis</i> OSUVM1 (PJMA01000002.1)                      | Equine stall            | USA                      | 100                            |
| <i>E. anophelis</i> PHOL-537 (RSAX01000013.1)                    | Urine                   | Canada                   | 99.93                          |
| <i>E. anophelis</i> PHOL-785 (RSAX01000007.1)                    | Endoscopy specimen      | Canada                   | 99.93                          |
| <i>E. anophelis</i> PW2809 (CBYE010000030.1)                     | NA                      | NA                       | 99.27                          |
| <i>E. anophelis</i> PW2810 (CBYF010000021.1)                     | NA                      | NA                       | 99.93                          |
| <i>E. anophelis</i> SEA01 (CP069277.1)                           | Blood                   | India                    | 98.29                          |

NA, not available.



**Figure S1.** Phylogenetic analysis derived from of the 16S rRNA gene sequences (A) and complete *rpoB* gene sequences (B) in 173 *Elizabethkingia* strains by the maximum-likelihood method based on the Jukes-Cantor model (JC69). The percentage of replicate trees in which the associated taxa clustered together in the bootstrap test of 1000 replicates and branch lengths of the evolutionary distances are shown.
